# Supplementary material for: Development of a Double Nuclear Gene-Targeting Method by Two-Step Transformation Based on a Newly Established Chloramphenicol-Selection System in the Red Alga Cyanidioschyzon merolae
Source: PubMed Central journal article supplement (PMC5348525; doi:10.3389/fpls.2017.00343), 2017-03-14
Supplement: Table_1.pdf [file Table_1.pdf]

**Supplementary Table 1. Primers used in the current study**

|    |                     |                                                  |
|----|---------------------|--------------------------------------------------|
| 1  | APCC(1)Fapc         | cttcggtcgttgaccATGTTTCGTTTCAGACCAGTTTCTTT        |
| 2  | APCC(180)R          | ATCATTCGCAACGCCAGATG                             |
| 3  | B-TUB(+1)           | TAAACTAGCTATTTATCTGGTACATATCATTTCAT              |
| 4  | B-TUB(+200)Rd184    | tcgctgagcggtttcACACTTTTTGCCTGCACAAGTTTTTCGTAC    |
| 5  | CAT(1)Fapcc         | ggcgttgccaatgatATGAACTTTAATAAAATTGATTTAGACAATTGG |
| 6  | CAT(650)taaRbt      | taaatagctagttaTAAAAGCCAGTCATTAGGCCTATC           |
| 7  | APCC(-1)R           | GGTCAACGAACGAAGAAACACAGAGAACAAGATAT              |
| 8  | D184(+28)F          | GAAACCGCTCAGCGACCAAGCGAC                         |
| 9  | D184(1270)F         | ACACGAATCACACGGTGCTG                             |
| 10 | D184(+1448)R        | TTGCCGATAACGCAGAAGAGA                            |
| 11 | D184(1200)F         | CGCCTTCTCCTGGACGAGTAC                            |
| 12 | D184(+1400)R        | CCAGAGCCCTACCGGCA                                |
| 13 | D184(2229)F         | CGGGCCGGAGAACATCTTTATTTTCGG                      |
| 14 | D184(+525)R         | GCCCTGACACGCGCTCGAG                              |
| 15 | D184(2409)F         | CACTTTTCAGGAAATTGTACGAGCCCT                      |
| 16 | D184(+375)R         | TGCTTTTTTCGCGAACGACCCC                           |
| 17 | D184(2559)F         | GGCTCGCATGGGTAAGTTCAG                            |
| 18 | D184(+225)R         | CGCTGTCTGTCAGCGC                                 |
| 19 | D184(2659)F         | TACAAGGAACCAGTTGAGGGTGTC                         |
| 20 | D184(+125)R         | TTGCGTCTGCGTGAACACTTGG                           |
| 21 | D184(2709)F         | GCCGAAGACGACGCTCCGAG                             |
| 22 | D184(+75)R          | CACGCGACGAGGTGGCGAG                              |
| 23 | CYC1(-1500)F        | GCTCGAATACACTCACTTGAGAG                          |
| 24 | CYC1(+2000)r        | CTATCGAACGCCTGTTCTGAA                            |
| 25 | URA(-897)F          | GAAGTGAAGGGCGAACGCA                              |
| 26 | URA(+471)R          | CCCTAGCAGCTGACTGTATC                             |
| 27 | CYC1(+200)Rura      | ttcggccctcagttcTTCGATGAGGTCTGGTGGC               |
| 28 | CYC1(+201)Fura      | agtcagctgctaggACTCGAACGCATGTGCTCG                |
| 29 | HA-F                | TACCCATACGATGTTCTGACTATG                         |
| 30 | HA-R                | AGCGTAATCTGGAACGTCATAA                           |
| 31 | CYC1(15)Rha         | aacatcgtatgggtaCGTTTCAACCAGCATGACCA              |
| 32 | CYC1(+4)Fha         | gttcagattacgctCTGGTTGAAACGAAGGGATCTG             |
| 33 | CDKA(-1800)F        | ACCCTGAACGGTAAGATGTTGC                           |
| 34 | CDKA(+1759)R        | TCAGTTGTGTACGGCGCTTT                             |
| 35 | APCC(-600)F         | CGACGAGAACGTATAAGGAGTGCGCACG                     |
| 36 | B-TUB(+200)R        | ACACTTTTTGCCTGCACAAGTTTTTCGTACG                  |
| 37 | CDKA(-799)Rapcc-600 | tatagcttctcgtcgTATGCCTGTATCGAGCCCGG              |
| 38 | CDKA(-798)Fbt+200   | gcaggcaaaaagtgtGCGACACGCATCAAACCACA              |
| 39 | CDKA(-1)R_FLAG      | gtctttgtagtccatGGTTCCTGAAAATCCGCAG               |
| 40 | FLAG-CDKA(4)F       | ATGGACTACAAAGACCATGACGGTGATTATAAAGATCATGACAT     |
| 41 | CDKA(-1760)F        | TGAGGCTCTGGGGTTGCAGAAC                           |
| 42 | CDKA(+675)R         | GTACGATGCTCGGTTGCGCCT                            |
| 43 | D184(1111)F         | GAGGTTCTGAAGAAGGACCG                             |
| 44 | D184(+1500)R        | GACGCATCCGCTCGTGTC                               |
| 45 | CYC1(-1800)F        | CCTCTTGCAACTTTTCCCTGC                            |
| 46 | CYC1(+2199)R        | ATACACTCGAACAGGCCCTC                             |
| 47 | CDKA(-1820)F        | CGAAGGGTCATGCGTGGAG                              |
| 48 | CDKA(+1039)R        | CGGTGTCCGCTTCTGTGC                               |
| 49 | D184(+68)F          | GTCGCGTGGTCTCGTCG                                |
| 50 | D184(+367)R         | TCGCGAACGACCCCGAAG                               |
| 51 | CAT(1)F             | ATGAACTTTAATAAAATTGATTTAGACAATTGG                |
| 52 | CAT(250)R           | CTAACTTATCCAATAACCTAACTCTCC                      |

Lowercase letters indicate adaptor sequences for In-Fusion reaction.
